# Supplementary material for: Solvent Fractionation and Acetone Precipitation for Crude Saponins from Eurycoma longifolia Extract
Source: PubMed Central journal article supplement (PMC6480193; doi:10.3390/molecules24071416), 2019-04-10
Supplement: molecules-24-01416-s001.pdf [file molecules-24-01416-s001.pdf]

**Table S1. Precipitated compounds in cold acetone from organic fractions of *Eurycoma longifolia***

| Rt (min) | m/z (-) | Fragment ion (-neutral loss)                                                         | Putative compound                           | Ethyl acetate | Butanol | Chloroform |
|----------|---------|--------------------------------------------------------------------------------------|---------------------------------------------|---------------|---------|------------|
| 9.6      | 411     | 319(-92)/291(-120)/273(-138)/ <b>249(-162)</b> /224                                  | unknown                                     | √             | √       | x          |
| 10.6     | 427     | 343(-84)/ <b>265(-162)</b>                                                           | unknown                                     | √             | x       | x          |
| 10.9     | 239     | 221(-18)/195(-44)                                                                    | β-carboline-1-propionic acid                | √             | √       | √          |
| 11.1     | 497     | 451(-46)/ <b>225(-226)</b>                                                           | formylated dihexose                         | x             | √       | √          |
| 11.7     | 610     | 564(-46)/546/ <b>451(-113)/338/225(-339)</b>                                         | formylated acylglycerol dihexose            | √             | √       | √          |
| 11.9     | 269     | 251(-18)/210                                                                         | unknown                                     | √             | √       | √          |
| 12.2     | 723     | 677(-46)/659/593(-84)/470/ <b>451(-226)/387/367/342/338(-339)/225/179</b>            | formylated trihexose                        | √             | √       | √          |
| 12.6     | 836     | 790(-46)/ <b>451(-339)/338/225</b>                                                   | formylated diacylglycerol dihexose          | √             | √       | √          |
| 12.7     | 949     | 903(-46)/897/836/ <b>451(-452)/225(-226)</b>                                         | formylated tetrahexose                      | √             | √       | √          |
| 13.2     | 643     | <b>463(-180)</b> /418(-45)/407(-236)/400/306/248(-152)/221/208/ <b>179/154</b>       | unknown                                     | √             | √       | x          |
| 13.5     | 663     | <b>483(-180)</b> /438(-225)/407(-256, -31)/326(-112)/221(-217)/154                   | unknown                                     | √             | √       | x          |
| 14.9     | 682     | <b>598(-84)/484(-198)</b> /441/ <b>374(-308)/324(-160)</b> /306/247/225              | hydroinositol hexosyl rhamnosyl glucuronide | √             | √       | √          |
| 15.3     | 702     | 512(-190)/485(-217)/ <b>374/344(-358)</b> /326/282                                   | unknown                                     | √             | √       | √          |
| 15.8     | 696     | 514(-182)/485(-211)/ <b>374/338(-358)</b> /320/238                                   | Hydrocaffeoyl derivative                    | √             | √       | √          |
| 16.1     | 639     | <b>414(-225)/383(-256, -31)</b> /317/273/229/180                                     | unknown                                     | √             | √       | √          |
| 16.8     | 811     | <b>503(-308)/324(-179)</b>                                                           | Pentasaccharide (rutinosyl raffinose)       | √             | √       | √          |
| 19.9     | 595     | <b>415(-180)</b> /315/279(-136)/241                                                  | Inositol derivatives                        | x             | √       | √          |
| 20.2     | 751     | <b>409(-342)</b> /350/237/191/151                                                    | unknown                                     | √             | √       | x          |
| 20.8     | 753     | 723/647/597/ <b>555(-198)</b> /433/365(-190)/387/ <b>341(-214)</b> /295(-26)/237/179 | unknown                                     | √             | √       | √          |
| 23.1     | 579     | <b>255(-324)</b> /187                                                                | Glucosoliquiritin                           | √             | √       | √          |
